# Supplementary material for: Georeferencing the Natural History Museum's Chinese type collection: of plateaus, pagodas and plants
Source: Biodivers Data J. 2020 May 5;8:e50503. doi: 10.3897/BDJ.8.e50503 (PMC7217978; doi:10.3897/BDJ.8.e50503)
Supplement: Supplementary material 3 — Erroneous country distributions [file bdj-08-e50503-s003.xlsx]

## Sheet: China statistics
	Information	Correct	Incorrect	N	Percentage Incorrect
	Locality	713	3023	3736	0.8092
	Collection Date	3153	583	3736	0.156
	Collection Event Code	3564	172	3736	0.046
	Country	3588	148	3736	0.0396
	Collector Name	3635	101	3736	0.027

## Sheet: Country distribution
	Continent	Country	Specimen Count
	Asia	India	83
	Asia	Pakistan	16
	Asia	Myanmar	9
	Asia	Tajikistan	6
	Asia	Japan	4
	Asia	Vietnam	4
	Asia	Bhutan	3
	Asia	Nepal	2
	Asia	Yemen	2
	Asia	Uzbekistan	1
	Asia	Oman	1
	Asia	Korea (North)	1
	Asia	Turkmenistan	1
	Asia	Indonesia	1
	Asia	Kyrgyzstan	1
	Asia/Europe	Turkey	5
	Asia/Europe	Russia	3
	Asia/Europe	Kazakhstan	2
	Europe	Germany	1
	Europe	Cyprus	1
	Europe	Greece	1
