# Supplementary material for: Georeferencing the Natural History Museum's Chinese type collection: of plateaus, pagodas and plants
Source: Biodivers Data J. 2020 May 5;8:e50503. doi: 10.3897/BDJ.8.e50503 (PMC7217978; doi:10.3897/BDJ.8.e50503)
Supplement: Supplementary material 4 — Spelling variations of Chinese provinces [file bdj-08-e50503-s004.csv]

Current Name	conventional	Dutch	French	French-obsolete	German	informal	informal-conventional	Italian	Norwegian	obsolete	Portuguese	Russian	Spanish	variant	Wade-Giles
Anhui			Ngan-houei							Ngan-hui					An-hui
Beijing			Pékin					Pechino		Pei-p'ing	Pequim	Пекин (Pekin)	Pekín		Pei-ching
Fujian		Foekien	Fou-kien		Fokien		Min Sheng								Fu-chien
Gansu		Kansoe	Kan-sou												Kan-su
Guangdong		Kwangtoeng	Kouang-tong, Kuan-tung								Kuangtung				Kuang-tung
Guangxi Zhuang	Kwangsi-Chuang	Kwangsi	Kouang-si		Kwangsi	Guangxi					Kuangsi				Kuang-hsi
Guizhou		Kweitsjou	Kouei-tcheou		Kweitschou						Kueichau				Kuei-chou
Hainan			Hai-nan												Hai-nan
Hebei		Hopei	Ho-pei		Hopei						Hopei				Ho-pei
Heilongjiang		Heiloengkiang	Hei-long-kiang												Hei-lung-chiang
Henan			Ho-nan												Ho-nan
Hubei		Hoepeh	Hou-pei		Hupei						Hupei				Hu-pei
Hunan		Hoenan	Hou-nan												Hu-nan
Jiangsu		Kiangsoe	Kiang-sou												Chiang-su
Jiangxi			Kiang-si												Chiang-hsi
Jilin			Ki-lin												Chi-lin
Liaoning			Leao-ning							Fengtien					Liao-ning
Inner Mongolia / Nei Mongol		Binnen-Mongolië	Mongolie-Intérieure		Innere Mongolei			Mongolia Interna	Indre Mongolia		Mongólia Interior		Mongolia Interior	Neimeng, Nei Monggol	Nei-meng-ku
Ningxia Hui	Ningsia		Ning-hia		Ninchsia, Ninghsia	Ningsia					Ninghsia				Ning-hsia
Qinghai			Ts'ing-hai		Tschinghai						Chinghai				Ch'ing-hai
Shaanxi		Sjensi	Chen-si		Schensi										Shen-hsi
Shandong		Sjantoeng	Chan-tong		Schantung										Shan-tung
Shanghai		Sjanghai	Chang-haï		Schanghai						Xangai
Shanxi		Sjensi	Chan-si		Schansi, Shansi						Shansi				Shan-hsi
Sichuan		Szetsjwan	Setchouan, Seu-tch'ouan, Sseu-tch'ouan		Sezuan, Szechuan, Szetschuan						Setsuan				Ssu-ch'uan
Tianjin			T'ien-tsin												T’ien-chin
Xinjiang Uygur	Sinkiang	Sinkiang-Oeigoer	Sin-kiang		Uigurische Autonome Region Xinjiang	Sinkiang, Xinjiang									Hsin-chiang
Xizang				Thibet	Sitsang						Tibete				Hsi-tsang
Yunnan		Junnan	Yun-nan		Jünnan, Yünnan										Yun-nan
Zhejiang		Tsjekiang	Tchö-kiang		Chekiang, Tschekiang						Chekiang				Che-chiang
