# Supplementary material for: Georeferencing the Natural History Museum's Chinese type collection: of plateaus, pagodas and plants
Source: Biodivers Data J. 2020 May 5;8:e50503. doi: 10.3897/BDJ.8.e50503 (PMC7217978; doi:10.3897/BDJ.8.e50503)
Supplement: Supplementary material 6 — Other data sources [file bdj-08-e50503-s006.csv]

Category	Website	Link
Maps	Mapcarta	https://mapcarta.com
Maps	Geonames	http://www.geonames.org/
Maps	Satellites pro	https://satellites.pro/
Maps	Delavay's map	https://gallica.bnf.fr/ark:/12148/btv1b53058862x/f1.zoom.r=Delavay,%20Jean-Marie.langFR
Collections/herbariums	JSTOR	https://plants.jstor.org/plants/browse
Collections/herbariums	GBIF | Global Biodiversity Information Facility	https://www.gbif.org/
Collections/herbariums	Chinese Virtual Herbarium	http://www.cvh.ac.cn/en
Romanization	Romanization chart	http://www.pinyin.info/romanization/compare/hanyu.html
Romanization	EFEO	https://en.wikipedia.org/wiki/EFEO_Chinese_transcription
Romanization	Pe̍h-ōe-jī	https://en.wikipedia.org/wiki/Pe%CC%8Dh-%C5%8De-j%C4%AB
Romanization	Southern Min	https://en.wikipedia.org/wiki/Southern_Min
Romanization	Cantolounge Jyutping Chart	https://cantolounge.com/jyutping-chart/
Romanization	Romanization chart	https://www.tuttocina.it/tuttocina/lingua/wg.htm
Other	Already transcribed locality names	http://tpittaway.tripod.com/china/chigaz.htm
Other	Historical country names	https://www.nationsonline.org/oneworld/historical_countrynames.htm
Books	Dictionnaire des noms anciens et modernes des villes et arrondissements de Chine	https://archive.org/details/dictionnairedes00biotgoog/page/n7
Books	Christianity in China	https://books.google.co.uk/books/about/Reference_Guide_to_Christian_Missionary.html?id=iJtX2qrOl_wC&redir_esc=y
Books	Plants of China: A Companion to the Flora of China	https://books.google.co.uk/books/about/Plants_of_China.html?id=aCw7CQAAQBAJ&redir_esc=y
Books	Heinrich Handel-Mazzetti's book	http://www.paeo.de/h1/hand_maz/pioneer/buch.html
Books	Memoirs and observations typographical, physical, mathematical, mechanical, natural, civil, and ecclesiastical, made in a late journey through the empire of China	https://quod.lib.umich.edu/e/eebo/A49911.0001.001/1:6?rgn=div1;view=fulltext
Books	Southern Tibet : vol.2	http://dsr.nii.ac.jp/toyobunko/VII-1-62/V-2/page/0196.html.ja
